# Supplementary material
Source: PubMed Central journal article supplement (PMC4349629)
Supplement: NIHMS666861-supplement-Supp_Data.pdf [file NIHMS666861-supplement-Supp_Data.pdf]

**Developmental Cell, Volume 31**

**Supplemental Information**

**An Essential Role for Senescent Cells  
in Optimal Wound Healing  
through Secretion of PDGF-AA**

**Marco Demaria, Naoko Ohtani, Sameh A. Youssef, Francis Rodier, Wendy Toussaint,  
James R. Mitchell, Remi-Martin Laberge, Jan Vijg, Harry Van Steeg, Martijn E.T. Dollé,  
Jan H.J. Hoeijmakers, Alain de Bruin, Eiji Hara, and Judith Campisi**

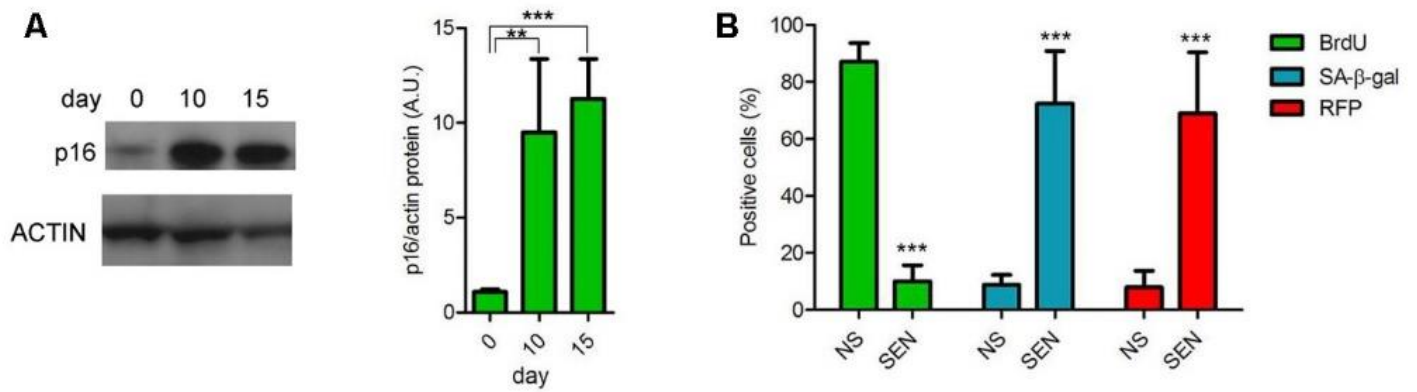

**Figure S1. Related to Figure 1. Characterization of p16-3MR cells.** (A) p16-3MR MEFs were induced to senescence by X-irradiation (IR; 10 Gy). p16<sup>INK4a</sup> (p16) protein levels were measured by immunoblotting on the indicated days after IR. Actin served as a loading control. Values were quantified using Image J (right panel). (B) MEFs were induced to senescence by IR (SEN) or mock irradiated (NS). 10 d after irradiation, the cells were assayed for BrdU incorporation (after a 24 hour pulse), SA-β-gal activity and RFP fluorescence, and the percentage of positive cells was determined. N=3. Data shown are the mean ± SD. \*\*p<0.01; \*\*\*p<0.001.

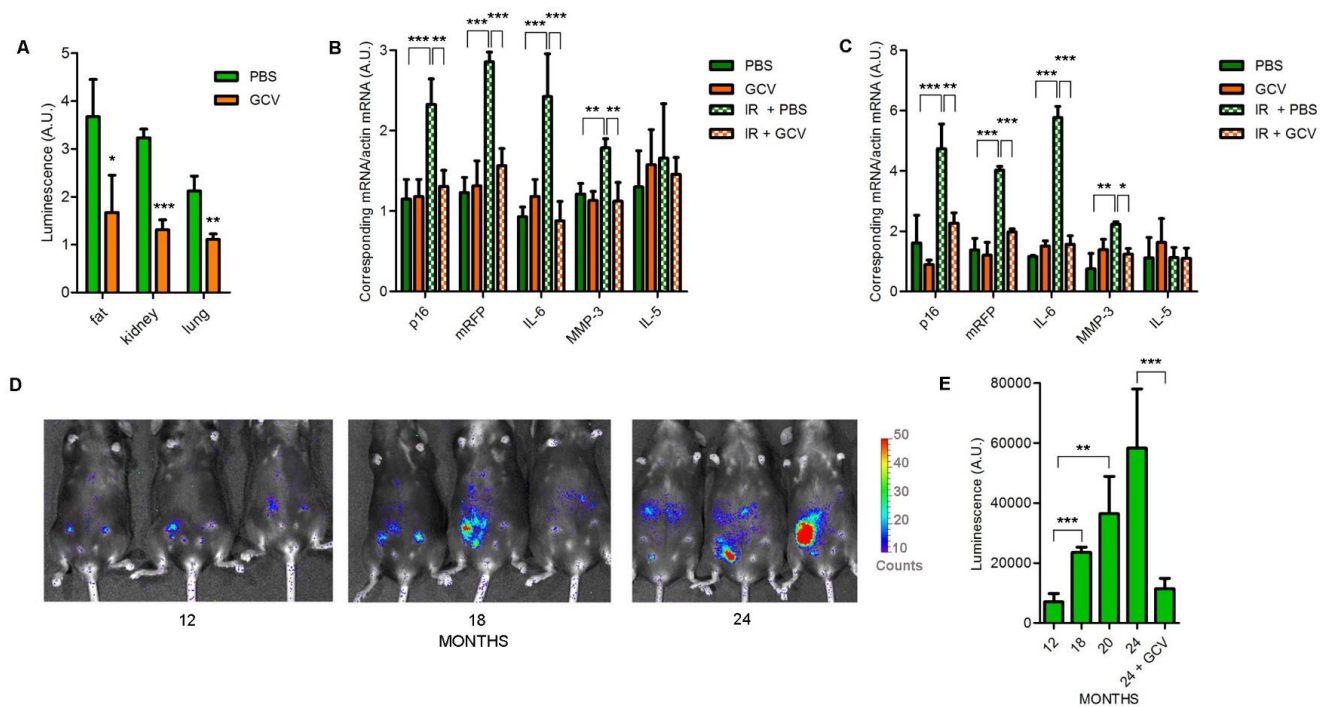

**Figure S2. Related to Figure 2. Characterization of p16-3MR mice.** (A-C) p16-3MR mice were X-irradiated (7 Gy whole body). 90 d later, they were treated with GCV or PBS for 5 d (25 mg/kg; daily i.p. injections). N=3. Mice were i.p. injected with coelenterazine and visceral fat, kidneys and lungs were excised and analyzed for luminescence using a Xenogen imager. (B,C) qRT-PCR was used to quantify levels of mRNAs encoding p16<sup>INK4a</sup>, mRFP, the SASP factors IL-6 and MMP-3, and the non SASP factor IL-5 in kidneys (B) and lungss (C). Actin was used to control for RNA quantity. (D-E) p16-3MR mice were injected i.p. with coelenterazine at the indicated ages and luminescence was measured. (D) shows a representative image, (E) shows quantification of the luminescence. A cohort of 24 mo old mice (N=5) was treated with GCV (5 daily i.p. injections; 25 mg/kg), after which luminescence was measured. A.U.=arbitrary units. Data shown are the mean  $\pm$  SD. \* $p$ <0.05; \*\* $p$ <0.01; \*\*\* $p$ <0.001.

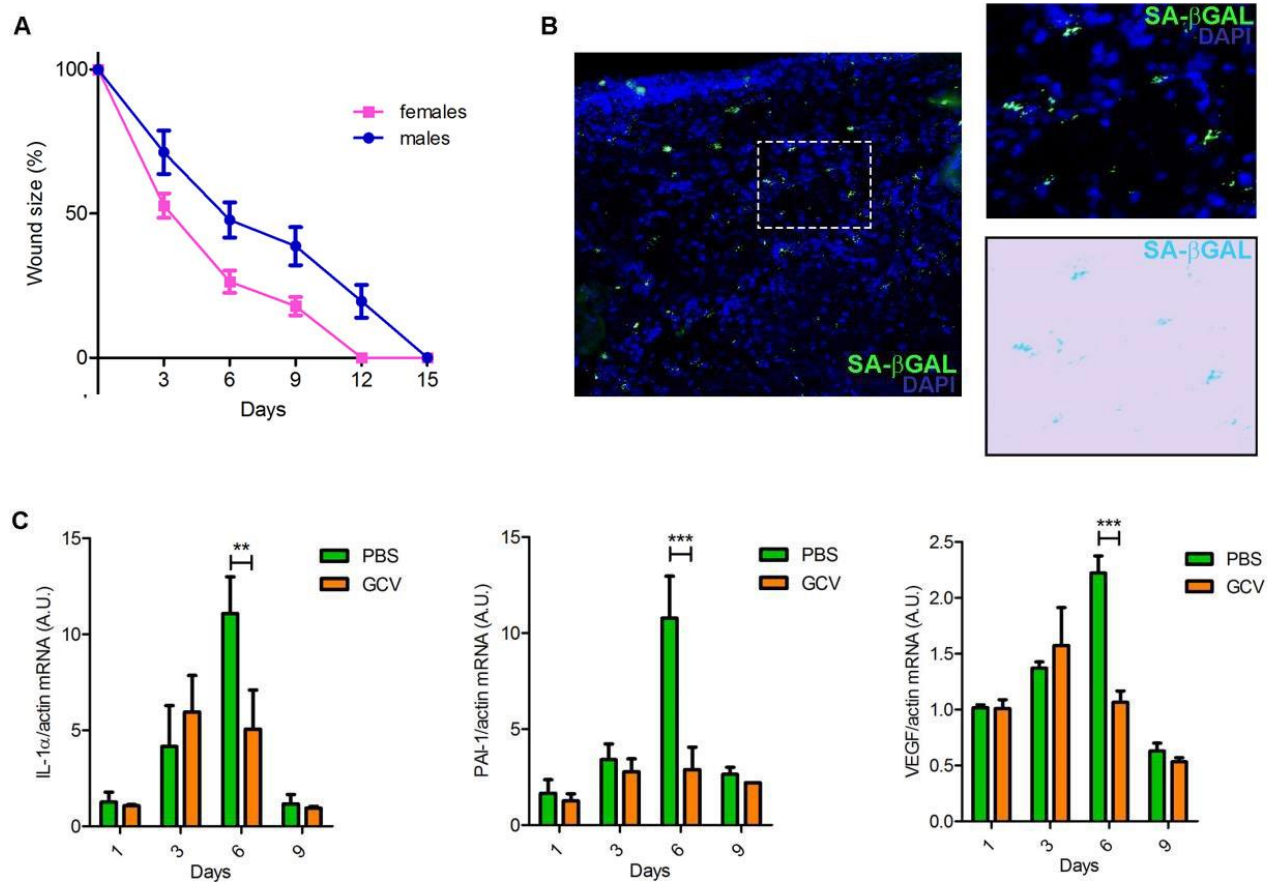

**Figure S3. Related to Figure 3. Senescent cells are induced and necessary for optimal cutaneous wound healing.** (A) 3-4 mos old female or male mice were wounded using a 6 mm punch to dorsal skin, and the size of the wound measured at the indicated day post-injury using a caliper. N=6. (B) Skin sections were collected 6 d after wounding female p16-3MR mice, fixed and stained for SA- $\beta$ -gal (green, false-color image reflecting the negative of the original staining) and counterstained with DAPI (blue). Inset shows higher magnification (400x) of both the negative and the original (bright field) staining. (C) mRNA levels of the indicated genes were quantified by qRT-PCR from skin biopsies excised from PBS or GCV-treated wounds to p16-3MR mice at the indicated intervals after injury. Actin was used to control for cDNA quantity. N=4. Data shown are the mean  $\pm$  SD. \*\* $p < 0.01$ ; \*\*\* $p < 0.001$ .

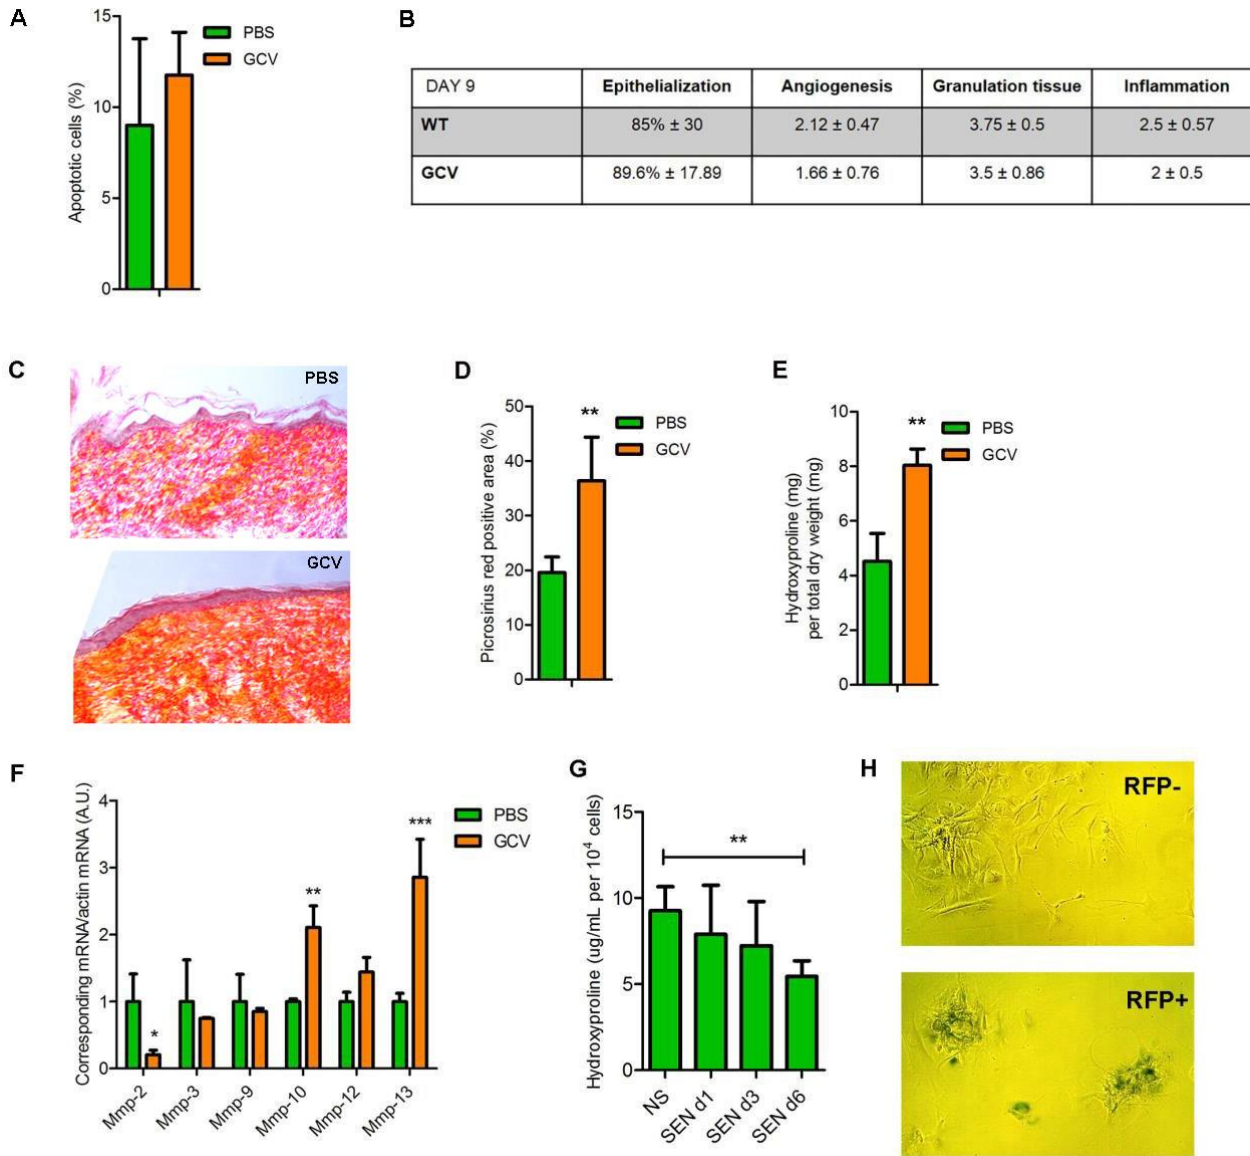

**Figure S4. Related to Figure 4. Characterization of senescent cells induced during wound**

**healing.** (A) Longitudinal sections of wounds collected 6 d after injury were assayed for apoptosis by TUNEL staining. (B) Longitudinal sections of wounds collected 9 d after injury were evaluated as in Figure 4A-C. (C) Skin biopsies were collected 15 d after wounding, paraffin embedded and stained with picrosirius red (orange color) to visualize collagen deposition. Micrographs were taken at 100X magnification. (D) The area of positive picrosirius red staining was calculated using ImageJ software, and is expressed as a percentage of the entire section. (E) Skin biopsies were collected 15 d after wounding were lysed and assayed for hydroxyproline content as an indicator of collagen production. (F) Skin biopsies were excised from PBS- and GCV-treated wounds to p16-3MR mice 6 d after injury, and analyzed for mRNA levels of the indicated genes encoding proteases by qRT-PCR. Actin was

used to control for cDNA quantity. (G) Dermal fibroblasts from p16-3MR mice were induced to senescence by x- irradiation and hydroxyproline content of the conditioned media was measured at varying intervals after irradiation (NS = non-senescent; d1 = day 1; d3 = day 3; d6 = day 6). (H) Cells isolated from wounds of p16-3MR mice 6 d after injury were sorted for RFP, fixed and stained for SA- $\beta$ -gal. N=4. Data shown are the mean  $\pm$  SD. \* $p$ <0.05; \*\* $p$ <0.01; \*\*\* $p$ <0.001.

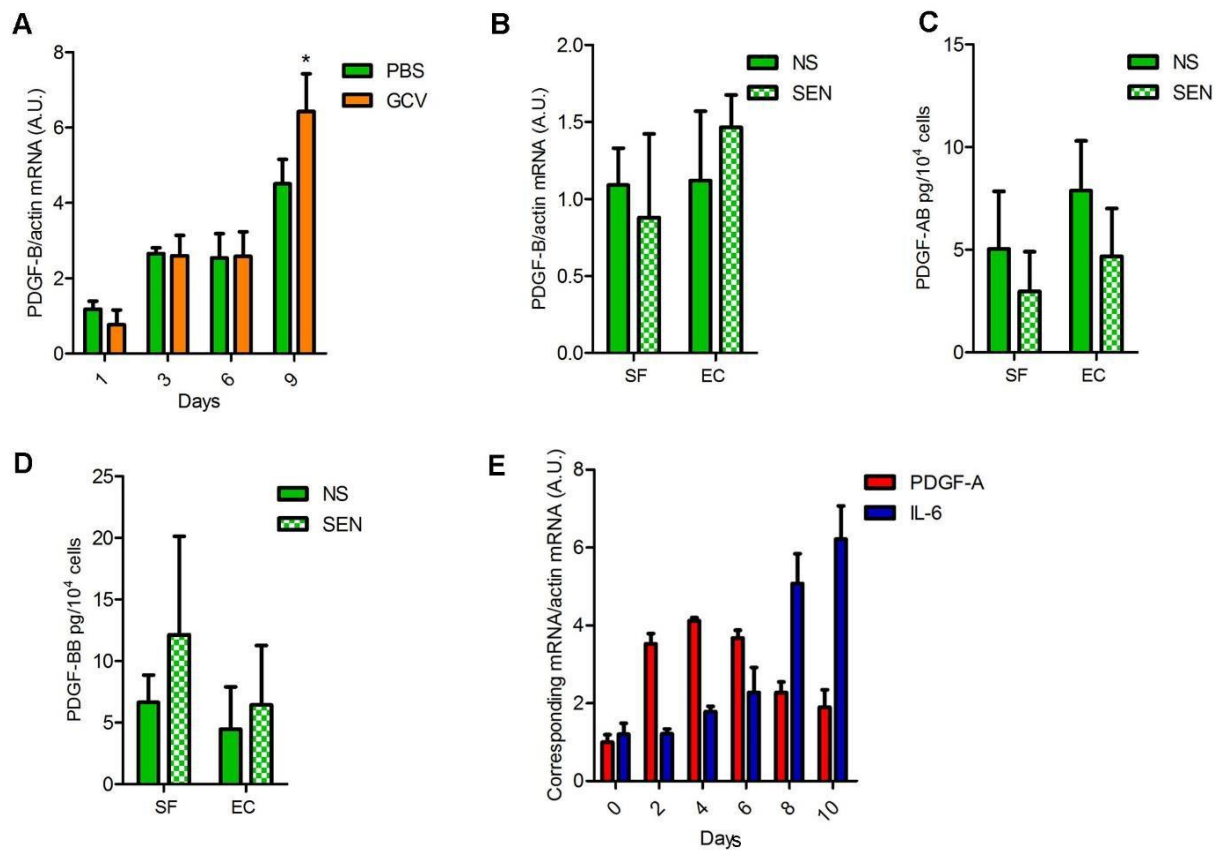

**Figure S5. Related to Figure 5. PDGF-A is expressed and secreted by senescent cells.**

(A) Skin biopsies excised from PBS- or GCV-treated wounds to p16-3MR mice were analyzed at the indicated intervals after injury for levels of mRNA encoding PDGF-B by qRT-PCR. Actin was used to control for cDNA quantity. (B-D) Murine skin fibroblasts (SF) and endothelial cells (EC) were mock irradiated (NS) or made senescent by X-irradiation (SEN; 10 Gy X-ray). N=4. (B) qRT-PCR was used to quantify PDGF-B mRNA relative to actin mRNA levels. A.U.=arbitrary units. (C-D) PDGF-AB and PDGF-BB levels in conditioned media were quantified by ELISA and normalized to cell number. (E) MEFs were irradiated (IR; 7Gy) and samples collected at the indicated times after irradiation. qRT-PCR was used to quantify PDGF-A and IL-6, relative to actin, mRNA levels. A.U.=arbitrary units. N=3. Data shown are the mean  $\pm$  SD. \* $p$ <0.05.

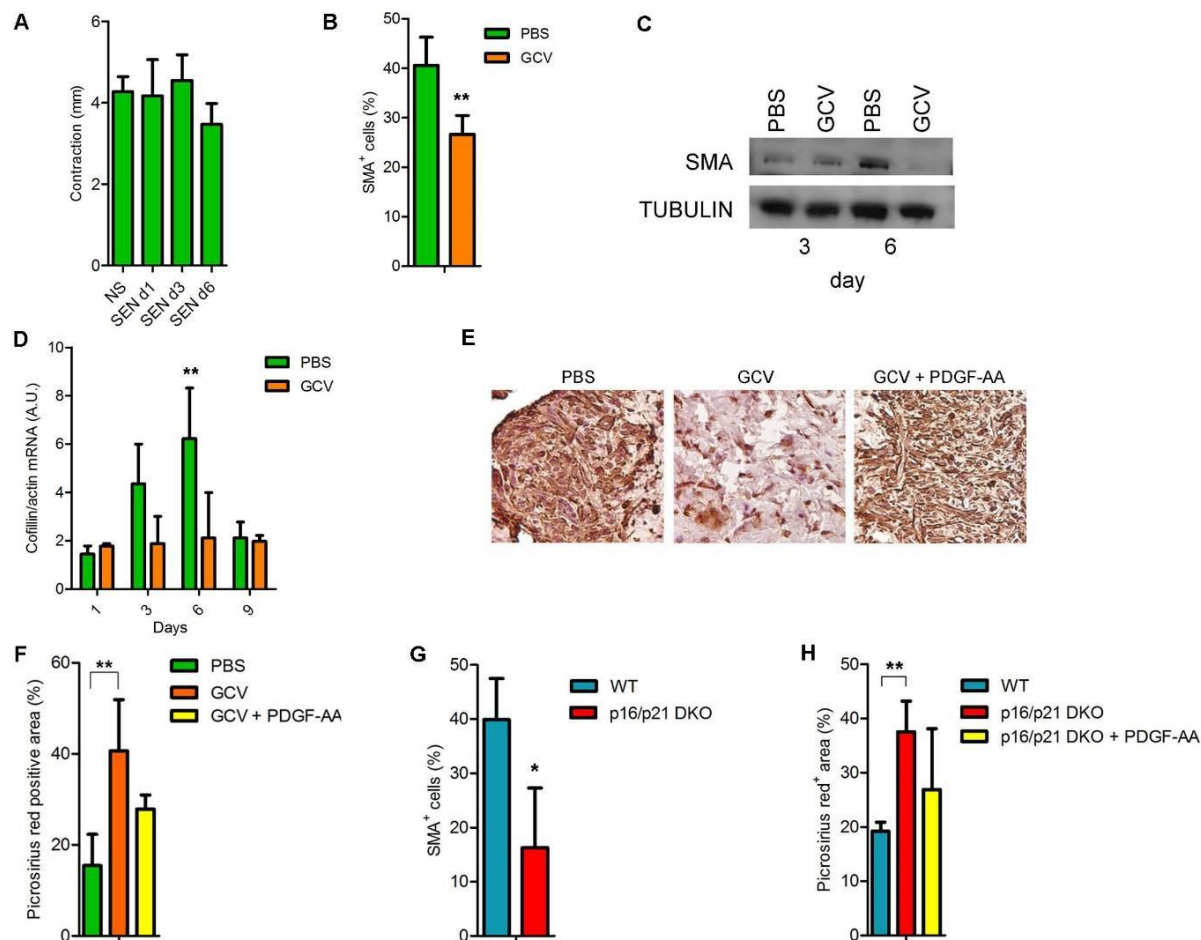

**Figure S6. Related to Figure 6. Senescence-associated PDGF-A drives myofibroblast differentiation.** (A) Dermal fibroblasts from p16-3MR mice were induced to senescence by X-irradiation and assessed for their ability to contract a collagen gel at the indicated intervals after irradiation (NS = non-senescent; d1 = day 1; d3 = day 3; d6 = day 6 after irradiation). N=4. (B) Paraffin-embedded longitudinal sections of wounds collected 6 d after wounding were immunostained for smooth muscle actin (SMA). The graph shows the percentage of SMA- positive cells compared to the total number of (FastRED-positive) cells in sections collected 6 d after wounding. N=5. (C) Levels of SMA were measured by immunoblotting at the indicated days after wounding. Tubulin served as a loading control. (D) mRNA levels of cofilin were quantified by qRT-PCR from skin biopsies excised from PBS or GCV-treated wounds to p16-3MR mice at the indicated intervals after injury. Actin was used to control for cDNA quantity. (E-F) Mice were injected with PBS, GCV or GCV followed by topical application of recombinant PDGF-AA. N=6. (E) Wounds were collected 6 d after injury and immunostained for SMA. (F) Skin biopsies collected 14 d after wounding were paraffin-embedded and stained with picrosirius red to detect collagen deposition. (G) Skin biopsies collected 6 d after injury to

WT or p16/p21 DKO mice were immunostained for SMA and nuclei were stained with FastRED. The graph shows the percentage of SMA-positive cells compared to total number of (FastRED-positive) cells. N=4. (H) Collagen deposition was measured as described in Fig S4D. Positive areas were quantified using ImageJ and expressed as percentage of the entire section. N=3. Data shown are the mean  $\pm$  SD. \*p<0.05; \*\*p<0.01.





aggatccaactcaatgtggccaatgacgacccttagaccgtagtgggttgcctgcattaaaaagcaagctgagcaagccagtgagagt  
gcccctccattgtccgctcagcagtccttctgcaggttctgtacagcttgagttcctgccttcctccctcagggatgacctgtttatcctt  
tctcccaggatacttttggcatggcctttgttatagcaatagaaagcaaaactaaaacaccaggcaagcattccaccaactgaatcagttg  
ccacacatttcatgactaaaacaaacacaaaattatcattgtgtaattataggagccgggtgtctaaaatgagtcgggagggtccattcct  
ttagaaggctaaaagccagaatgggcttttattctagcttagtctgttggccaggatgcccacatctctgacctctgtgtctctg  
cttatacttctctgtggcaggatctctgaaaacctccagcgtattctggtagtccagagtgatggggattcaggagcctgggttgcac  
acttgaaaaatgtacctcaagatccttaataataatagtgcttaatacagtgctgtctactatgtcttctctctagttacagttcaaaggacg  
aataatttaagataggagggaacattactatttagggacatgcttcttatttataactaaagaaattgaagtataacattccagaaaagact  
aggtaacaaaaaaaaaaaaaagtgagaattctggtgtcttttttggcaaccttttttagtaattaccacacaatcccagttcggctta  
aaggcaagtgtgtgtctatgtcccggcgatgttctacaggagtttgagtaccaggaaatcttagggaatacactgtaagcctgtgtgt  
aagaagaattccaaggcgggactaggagcctttatggggtagagcctcctgactgtggatgtctgatccgagtagttaacagcggagcct  
cgtacatagggtcttcttgggtcctgccctcactctggccgtgatccctctacttttctctgacttttcaggtgatgatgaggcaacgttc  
acgtagcagcttctgtcaactacgggtgcagattcgaactgcgaggacccactaccttctcccggccgggtgcacgacgcagcgcgg  
gaaggcttctggacacgctggtggtgtgcacgggtcaggggctcggctggatgtgcgcatgctggggctgcctgccgtcgcacttg  
gccaagagcggggacatcaagacatcgtgcgatatttgcgtccgctgggtgctcttgtgtccgctgggtggtcttgtgtaccgctggg  
aacgtcgcacagaccgacgggcatagcttcagctcaagcagcccaggtgagcatagttggccaagccttctgacactcagaaaa  
agaagaagcaacccaaatgagcctgagaacatggacaccataagtcccattttaccaccccgtggctcctggtaaggccttaggc  
tggtaccacgagggcaggaggggtcagaggttaacattcattcagttctgcacacgcccggccggccggccggccggtagagc  
agcagcatctgccggttttgcagcctctcagctcctgctggtggactgattccagttctgaaccaagttactctacacctgccctcagc  
tctgcgtaagcagatttgaaaccttggccttcgcaggggaaagtttctcggccctccagggcgtttgaggatatctgagatggagatct  
tccatgatcccctccagagaaaagagactctgtcctttccagctctttcaagtttacattttagggtggagacgtggctcagctgtaagagt  
gccctgctttcctgaggtaaaactcaaaaattccaacaccacttgaggaagccttatatcagcctggaatttcagctcctgggaattcgat  
gcctgtgacctctgtgagcaccgtgcaagcgggtatatacactagttcctaaaccgtaaacgtcccacttctggagacgtgattaaacca  
cgtatcagtataagcctcctttccttcaaaccttcagcaaccaggaagccttcttttggatccccccacccccacccccacacac  
agccataaaaatgtcaggcttaaagttttcatctgcaccgggcagtggtggcacacgcctttagtcctagcactgggaggcagaggca  
ggcggatttctgagttgaggccagcctggtctacaaagtgagttccaggactgccagggtacacagagaaaacctgcttgggtggg  
gggagctttcatttgtaaggagaaaaatatttaataaaaataggatataatgaagcagaatacggaaataacacaaatgtttagttaaaa  
catggttagacgatattagaatagatcctgtttcagctggaacaagtggtcaacagctccttctggccttggagtcagtgtagattctaa  
gctgcaacaagaagagggtcagaggtgggtcctaatttgatggccccatccctccaagtgcacagggcaggtgttcgagaaaacct

gtttcagtgagtaggtttgcataacggagctgaggaggcgtggccaggataaagaagtggtagagaagctgctaaggagagctgga  
gtgaggaacgcagggcacagagaccgtgggaacagttgcagaaggggtgggggactagcgagtgaagccagctcttatgggagccc  
tgaagagcttaaaggagactccagatcccattagtagttatagaggaggaaacggaaaagatcactgcgaggggccctcagcttc  
caaagactggccttctgctcccggcctggaaggcaccgatggagggggcaaggagacaacactcctaccgccgctgcgggccgggt  
aagatagattgccccttgctttgagctcctggttctccccacacacacccacacccccacccccctgctgccaagagagagccagtcca  
ccgccaagcacaagcggctatcgctggtggtaacctgcagagatctgggtatcagagactggagatgctcagaaggccacctaga  
gagcctagcaaagggggtggagggagaggaatgctgcacacgccgggagcagtgcagaagcggagcagcggctggtggcacct  
aggacagcttatataatattgtttctctctttcttgcagggccctggaactcgcggccaatccaagagcagagctaatactagaatccg  
gcctcagcccgccttttctttagcttcaactctagcgatgctagc

The original exonic sequence of WT p16 locus is shown below, with 5' and 3'UTRs in purple,  
coding sequence in black, and the BstB1 restriction site used for integration of the 3MR cDNA in  
Exon 2 in red:

Exon 1

ACTGGTCACACGACTGGGCGATTGGGCGGGCACTGAATCTCCGCGAGGAAAGCGAACTC  
GAGGAGAGCCATCTGGAGCAGCATGGAGTCCGCTGCAGACAGACTGGCCAGGGCGGCG  
GCCAGGGCCGTGTGCATGACGTGCGGGCACTGCTGGAAGCCGGGGTTTCGCCCAACGC  
CCCGAACTCTTTCGGTCGTACCCCGATTCAG

Exon 2

GTGATGATGATGGGCAACGTTACGTAGCAGCTCTTCTGCTCAACTACGGTGCAGATTTCG  
AACTGCGAGGACCCCACTACCTTCTCCCGCCCGGTGCACGACGCAGCGCGGGAAGGCTT  
CCTGGACACGCTGGTGGTGTGCTGCACGGGTCAGGGGCTCGGCTGGATGTGCGCGATGCCT  
GGGGTCGCCTGCCGCTCGACTTGGCCCAAGAGCGGGGACATCAAGACATCGTGCGATAT  
TTGCGTTCCGCTGGGTGCTCTTTGTGTTCCGCTGGGTGGTCTTTGTGTACCGCTGGGAAC  
GTC

Exon 3

GGCCCTGGA ACTTCGCGGCCAATCCCAAGAGCAGAGCTAAATCCGGCCTCAGCCCGCCTT  
TTTCTTCTTAGCTTCACTTCTAGCGATGCTAGCGTGTCTAGCATGTGGCTTTAAAAATACA  
TAATAATGCTTTTTTTGCAATCACGGGAGGGAGCAGAGGGAGGGAGCAGAAGGAGGGA

GGGAGGGAGGGAGGGACCTGGACAGGAAAGGAATGGCATGAGAACTGAGCGAAGGCG  
GCCGCGAAGGGAATAATGGCTGGATTGTTTAAAAAATAAAATAAAGATACTTTTAAAATG  
TC

RecA-mediated integration of the 3MR cDNA into the parental BAC via homology arms and excision of vector sequences in E coli (PMCID:102750) resulted in the modified BAC exonic sequence shown below. Remains of the BstBI site is in red, linker sequence surrounding the 3MR cDNA is in orange, stop codon in the p19ARF reading frame is in blue, and the 3MR coding sequence is in green:

atgtctagcggtagccaccatggctccaaggtgtacgaccccgagcaacgcaaacgcatgatcactgggacctcagtggtgggct  
cgctgcaagcaaatgaacgtgctggactcctcatcaactactatgattccgagaagcacgccgagaacgccgtgattttctgcatgg  
taacgtgctccagctacctgtggaggcacgtcgtgcctcacatcgagcccgtagatgcatcatccctgatctgatcggaatgg  
gtaagtccggcaagagcggaatggctcatatcgctcctggatcactacaagtacctcaccgcttggttcgagctgctgaacctcca  
aagaaaatcatctttgtggccacgactgggggctgtctggccttctactactctacgagcaccaagacaagatcaaggccatcg  
tccatgctgagagtgtcgtggacgtgatcgagtcctgggacgagtgccctgacatcgaggaggatcgccctgatcaagagcgaa  
gagggccagaaaatggtgctgagaataacttctcgtcgagaccatgctccaagcaagatcatcggaactggagcctgagga  
gttcgctgcctacctggagccattcaaggagaagggcgaggtagacggcctaccctctcctggcctcgagatccctctcgtaag  
ggaggcaagcccagctcgtccagattgtccgcaactacaacgcctacctcgggcccagcgacgatctgcctaagatgttcacgag  
tccgacctgggttctttcaacgctattgtcgagggagctaagaagtccctaacaccgagttcgtgaaggtgaagggcctccactc  
agccaggaggacgctccagatgaaatgggtaagtacatcaagagctcgtggagcgctgctgaagaacgagcagctcgagaatt  
ctcacgctctgcaggatatcaagctccaccatggcctcctccgaggacgtcatcaagttcatgcgctcaaggctcgcatggaggg  
ctccgtgaacggccacgagttcgagatcgagggcgagggcgagggccgccctacgagggcaccagaccgccaagctgaag  
gtgaccaagggcgccccctgccctcgcctgggacatcctgtcccctcagttccagtacggctccaaggcctacgtgaagcacc  
gccgacatccccgactactgaagctgtcctccccgagggctcaagtgaggcgctgatgaactcgaggacggcggtggtg  
accgtgaccagactcctccctgcaggacggcgagttcatctacaaggtgaagctgcgcggcaccaactcccctccgacggccc  
cgtaatgcagaagaagaccatgggctgggaggcctccaccgagaggatgtaccccgaggacggcgccctgaagggcgagatca  
agatgaggctgaagctgaaggacggcgccactacgacgccgaggtcaagaccacctacatggccaagaagcccgtgcagctg  
cccggcctacaagaccgacatcaagctggacatcacctcccacaacgaggactacacatcgtggaacagtacgagcgcc

gagggccgcccactccaccggcgccaccgcgggcccgggatccgccaccatgccacgctactgcgggttatatagacggtcccc  
acgggatggggaaaaccaccaccaccacgcaactgctggtggccctgggttcgcgcgacgatctgtctacgtaccgagccgat  
gacttactggcggtgctgggggctccgagacaatcgcaacatctacaccacacaacaccgcctcgaccagggtgagatatcgg  
ccggggacgcgcggtgtaatgacaagcggccagataacaatgccttatgccgtgaccgacgccgttctggctcctcatatcgggg  
gggaggctgggagctcacatgccccgccccggccctcaccatcttctcgaccgccatcccatcgcctcatgctgtgctaccggc  
cgcgcggtaccttatgggcagcatgacccccaggccgtgctggcgctcgtggccctcatcccggacctgcccggcaccaacat  
cgtgctggggccctccggaggacagacacatcgaccgctggcceaacgccagcgcgggggagcgggctggacctggctatg  
ctggctgcgattcggcggttacgggctactgccaatacgggtcgggtatctgcagtgcggcgggtcgtggcgggaggactggggac  
agcttcggggacggccgtgccgccccagggtgccgagccccagagcaacgcgggcccacgaccccatatcggggacacgttatt  
taccctgttcgggccccgagttgatggccccaacggcgacctgtataacgtgtttgcctgggacctggacgtttggcceaacgcct  
ccgttccatgcacgtctttatcctggattacgaccaatcgccgcccggctgccgggacgcctgctgcaacttacctccgggatggtcc  
agaccacgtcaccacccccggctccataccgacgatatgcgacctggcgcgcacgtttgccgggagatgggggaggctaactg  
accggggaattctgcagatatccagcacagtggcgccgcat

## 2. Insertion of Neo resistance cassette into modified BAC

A 774 bp fragment of the SacB gene (below) in the BAC backbone was amplified by PCR using the BAC as a template with SacB forward (SacB F, gtccggttctgcaacc) and reverse (SacB R, ccttggttgccggcac) primers. A kan/neo resistance cassette was cloned into the HindIII site (in bold red below) and integrated into the modified BAC using  $\gamma$  Red-mediated recombination (PMID:10037821):

gtccggttctgcaacccttacatctgacggaaaaatccggttattctactgactattccggtaacattacggcaaacaaagcctgac  
aacagcgcaggtaaattgtgtcaaatctgatgacacactcaaatcaacggagtggaagatcacaaaacgattttgacggagacg  
gaaaaacatatcagaacggttcagcagttatcgatgaaggcaattatacatccggcgacaaccatacgctgagagaccctcactacg  
ttgaagacaaaggccataaataccttgattcgaagccaacacgggaacagaaaacggataccaaggcgaagaatctttattaac  
aaagcgtactacggcggcggcacgaacttctccgtaaagaaagccag**aagctt**cagcagagcgctaaaaaacgcgatgctgag  
ttagcgaacggcgcctcggtatcatagagttaataatgattacacattgaaaaaagtaatgaagccgctgatcacttcaaacacgg  
taactgatgaaatcgagcgcgcaatgtttcaaatgaacggcaaattgtactgttcactgattcacgcggttcaaaaatgacgatc  
gatggtattaactcaaacgatatttacatgcttggttatgtatcaaacctttaaccggcccttacaagccgctgaacaaaacagggctgt  
gctgcaaatgggtcttgatccaaacgatgtgacattcacttactctcacttcgca**gtgccgcaagccaagg**

Real Time-PCR. The primers and probes were as follows:

*ACTIN*: #64; FW 5'-ctaaggccaaccgtgaaaag-3'; RV 5'-accagaggcatacagggaca-3'

*TUBULIN*: #88; FW 5'-ctggaacccacggtcatc-3'; RV 5'-gtggccacgagcatagttatt-3'

*p16<sup>INK4a</sup>*: #91; FW 5'-aatctccgagaggaaagc-3'; RV 5'-gtctgcagcggactccat-3'

*mRFP*: #161; FW 5'-gacctcggcgtcgtagt-3'; RV 5'-aagggcgagatcaagatgag-3'

*CFL1* (cofilin): #6; FW 5'-tctgtctcccttctgttcc-3'; RV 5'-ttgaacaccttgatgacacat-3'

*PDGFA*: #52; FW 5'-gtgcgacctccaacctga-3'; RV 5'-ggctcatctcacctcacatct-3'

*IL-6*: #6; FW 5'-gctaccaaactggatataatcagga-3'; RV 5'-ccaggtagctatggtactccagaa-3'

*LMNB1*: #15; FW 5'-gggaagttattcgttgaaga-3'; RV 5'-atctcccagcctccatt-3'

*IL-5*: #91; FW 5'-acattgaccgcaaaaagag-3'; RV 5'-atccaggaactgcctcgtc-3'

*p21*: #9; FW 5'-ttgccagcagaataaaaaggtg-3'; RV 5'-ttgctcctgtgcggaac-3'

*PDGF-B*: #32; FW 5'-cggcctgtgactagaagtcc-3'; RV 5'-gagcttgaggcgtcttg-3'

*IL-1 $\alpha$* : #29; FW 5'-tccataacctgatctggaa-3'; RV 5'-ttggtgaggaatcattcat-3'

*PAI-1*: #69; FW 5'-aggatcgaggtaaacgagagc-3'; RV 5'-ttggtgaggaatcattcat-3'

*VEGF*: #1; FW 5'-aaaaacgaaagcgcaagaaa-3'; RV 5'-tttctccgctctgaacaagg-3'

*CCL5*: #110; FW 5'-tgcagaggactctgagacagc-3'; RV 5'-gagtgggtgccgagccata-3'

*FGF*: #53; FW 5'-aacgcatagcgttctgaat-3'; RV 5'-aaaacagctcccacagagga-3'

*CCL2*: #62; FW 5'-catccacgtgttggtca-3'; RV 5'-gatcatctgtggtgaatgagt-3'

*TGF- $\beta$ 1*: #72; FW 5'-tggagcaacatgtggaactc-3'; RV 5'-cagcagccggttaccag-3'

*MMP2*: #77; FW 5'-taacctggatgccgtcgt-3'; RV 5'-ttcaggttaataagcacccttga-3'

*MMP3*: #36; FW 5'-caaaacatatttctgttagaggaaa-3'; RV 5'-ttcagctatttctgtggaaa-3'

*MMP9*: #19; FW 5'-acgacatagacggcatcca-3'; RV 5'-gctgtggttcagttgtgtg-3'

*MMP10*: #81; FW 5'-gagtctggctcatgcctacc-3'; RV 5'-caggaataagttggtccctga-3'

*MMP12*: #15; FW 5'-tgaattgcatttctgtacatagt-3'; RV 5'-tgctgtaagtccatgggtga-3'

*MMP13*: #10; FW 5'-aaggggataacagccactaaa-3'; RV 5'-accaacataaaaattaagccaaatg-3'

*VIMENTIN*: #1; FW 5'-gtaccggagacaggtgcagt-3'; RV 5'-ttcttctcatctcacgcatc-3'

*SMA*: #58; FW 5'-ctctctccagccatcttcat-3';RV 5'-tataggtggttcgtggatgc-3'

*ENDOTHELIN-1*: #50; FW 5'-ctgctgttcgtgactttcca-3';RV 5'-tctgcactccattctcagctc-3'

*KERATIN-1*: #62; FW 5'-ttgcctcctcatcgaca-3';RV 5'-gtttgggtccgggtgt-3'

*KERATIN-10*: #95; FW 5'-cgtactgttcagggctcggag-3';RV 5'-gctccagcgattgttca-3'
